# Supplementary material
Source: PubMed Central journal article supplement (PMC3247971)

**Supplementary Information for:-**

**THE INTERFACE BETWEEN CATALYTIC AND HEMOPEXIN DOMAINS IN MATRIX METALLOPROTEINASE-1 CONCEALS A COLLAGEN BINDING EXOSITE**

**Laurence H. Arnold, Louise Butt, Stephen H. Prior, Chris Read, Gregg B. Fields, Hideaki Nagase, Rob Visse and Andrew R. Pickford**

**Suppl. Table S1. Oligonucleotides for Site-Directed Mutagenesis of MMP-1.**

| <b>Mutant</b> | <b>Direction</b> | <b>Sequence</b>                              |
|---------------|------------------|----------------------------------------------|
| D299A         | Forward          | GTGATGTTCTTTAAAGCGAGATTCTACATGCGCAC          |
|               | Reverse          | GTGCGCATGTAGAATCTCGCTTTAAAGAACATCAC          |
| R300A         | Forward          | GAAGTGATGTTCTTTAAAGACGCGTTCTACATGCGCACAAATCC |
|               | Reverse          | GGATTTGTGCGCATGTAGAACGCGTCTTTAAAGAACATCACTTC |
| F301A         | Forward          | GATGTTCTTTAAAGACAGAGCGTACATGCGCACAAATCCC     |
|               | Reverse          | GGGATTTGTGCGCATGTACGCTCTGTCTTTAAAGAACATC     |
| F308A         | Forward          | CATGCGCACAAATCCCGCTACCCGGAAGTTGAG            |
|               | Reverse          | CTCAACTCCGGGTAGGCGGGATTTGTGCGCATG            |
| Y309A         | Forward          | GCACAAATCCCTTCGCCCCGGAAGTTGAGCTC             |
|               | Reverse          | GAGCTCAACTTCCGGGGCGAAGGGATTTGTGC             |
| F316A         | Forward          | CGGAAGTTGAGCTCAATGCGATTTCTGTTTTCTGGCC        |
|               | Reverse          | GGCCAGAAAACAGAAATCGCATTGAGCTCAACTTCCG        |
| S318A         | Forward          | GTTGAGCTCAATTTCAATTGCGGTTTTCTGGCCACAAC TG    |
|               | Reverse          | CAGTTGTGGCCAGAAAACCGCAATGAAATTGAGCTCAAC      |
| V319A         | Forward          | CTCAATTTCAATTTCTGCGTTCTGGCCACAAC TGCC        |
|               | Reverse          | GGCAGTTGTGGCCAGAACGCAGAAATGAAATTGAG          |
| P325A         | Forward          | GTTTTCTGGCCACAAC TGCGAATGGGCTTGAAGCTGC       |
|               | Reverse          | GCAGCTTCAAGCCATTCGCCAGTTGTGGCCAGAAAAC        |
| R337A         | Forward          | CTTACGAATTTGCCGACGCGGATGAAGTCCGGTTTTTC       |
|               | Reverse          | GAAAAACCGGACTTCATCCGCGTCGGCAAATTCGTAAG       |
| D338A         | Forward          | GAATTTGCCGACAGAGCGGAAGTCCGGTTTTTC            |
|               | Reverse          | GAAAAACCGGACTTCCGCTCTGTCCGGCAAATTC           |
| Q352A         | Forward          | GTA CTGGGCTGTTGCGGGACAGAATGTGC               |
|               | Reverse          | GCACATTCTGTCCCGCAACAGCCCAGTAC                |
| Q354A         | Forward          | GGCTGTT CAGGGAGCGAATGTGCTACACG               |
|               | Reverse          | CGTGTAGCACATTCGCTCCCTGAACAGCC                |
| H358A         | Forward          | GGACAGAATGTGCTAGCGGGATACCCCAAGGAC            |
|               | Reverse          | GTCCTTGGGGTATCCCGCTAGCACATTCTGTCC            |
| P361A         | Forward          | GAATGTGCTACACGGATACGCGAAGGACATCTACAGCTCC     |
|               | Reverse          | GGAGCTGTAGATGTCCTTCGCGTATCCGTGTAGCACATTC     |

**Suppl. Table S2. Chemical Shift Assignments for HPX-1 at pH 4.8 and 25°C.**

| Residue | H     | N      | C      | C $\alpha$ | C $\beta$ | Residue | H     | N      | C      | C $\alpha$ | C $\beta$ |
|---------|-------|--------|--------|------------|-----------|---------|-------|--------|--------|------------|-----------|
| Pro272  | -     | n.d.   | 177.03 | 61.61      | 31.48     | Gln323  | 8.24  | 115.42 | 174.53 | 54.84      | 27.50     |
| Gln273  | 8.45  | 121.45 | 174.41 | 53.95      | 27.84     | Leu324  | 7.37  | 122.79 | 172.84 | 50.39      | 40.07     |
| Thr274  | 8.12  | 121.11 | 170.80 | 58.65      | 67.75     | Pro325  | -     | n.d.   | 171.86 | 60.16      | 30.33     |
| Pro275  | -     | n.d.   | 173.41 | 61.21      | 30.57     | Asn326  | 7.47  | 112.27 | 174.50 | 50.23      | 38.47     |
| Lys276  | 8.09  | 122.06 | 174.83 | 53.51      | 31.99     | Gly327  | 7.86  | 111.29 | 173.75 | 46.66      | -         |
| Ala277  | 8.18  | 126.01 | 175.62 | 53.12      | 16.89     | Leu328  | 8.37  | 123.10 | 174.79 | 53.52      | 41.19     |
| Cys278  | 7.84  | 110.64 | 173.52 | 52.79      | 38.03     | Glu329  | 8.60  | 118.45 | 174.32 | 55.29      | 30.75     |
| Asp279  | 7.45  | 124.37 | 175.95 | 52.71      | 40.84     | Ala330  | 7.76  | 118.89 | 174.30 | 50.22      | 20.75     |
| Ser280  | 8.72  | 124.88 | 173.92 | 59.09      | 61.71     | Ala331  | 8.90  | 125.70 | 172.75 | 50.18      | 21.94     |
| Lys281  | 8.52  | 122.80 | 174.62 | 54.20      | 30.15     | Tyr332  | 8.99  | 117.42 | 169.33 | 55.63      | 38.88     |
| Leu282  | 7.19  | 125.66 | 172.48 | 55.31      | 41.30     | Glu333  | 7.80  | 123.90 | 174.02 | 52.41      | 31.43     |
| Thr283  | 6.74  | 114.55 | 170.90 | 57.35      | 69.44     | Phe334  | 9.33  | 130.70 | 173.92 | 52.43      | 36.78     |
| Phe284  | 9.17  | 116.24 | 174.98 | 56.35      | 41.13     | Ala335  | 9.34  | 132.70 | 178.91 | 54.45      | 16.65     |
| Asp285  | 9.21  | 124.23 | 174.60 | 54.15      | 40.65     | Asp336  | 8.06  | 118.52 | 175.22 | 55.11      | 38.96     |
| Ala286  | 7.79  | 121.26 | 173.43 | 50.39      | 19.27     | Arg337  | 6.30  | 114.80 | 172.98 | 52.48      | 30.12     |
| Ile287  | 8.72  | 123.88 | 172.03 | 59.11      | 43.09     | Asp338  | 7.99  | 122.54 | 172.24 | 52.94      | 38.28     |
| Thr288  | 8.59  | 118.79 | 171.25 | 58.75      | 68.09     | Glu339  | 7.04  | 116.02 | 173.52 | 52.74      | 34.35     |
| Thr289  | 6.91  | 117.14 | 174.18 | 59.81      | 68.40     | Val340  | 8.75  | 125.71 | 172.40 | 59.08      | 31.70     |
| Ile290  | 8.50  | 120.35 | 174.37 | 59.98      | 38.25     | Arg341  | 8.82  | 128.07 | 172.12 | 52.90      | 31.36     |
| Arg291  | 10.41 | 133.19 | 175.09 | 55.70      | 27.20     | Phe342  | 8.72  | 121.59 | 173.49 | 55.23      | 42.52     |
| Gly292  | 9.33  | 108.38 | 172.98 | 44.07      | -         | Phe343  | 8.81  | 121.53 | 173.67 | 56.13      | 40.55     |
| Glu293  | 7.84  | 121.98 | 173.98 | 53.28      | 30.34     | Lys344  | 8.75  | 123.54 | 174.85 | 56.81      | 34.59     |
| Val294  | 8.33  | 122.96 | 172.40 | 61.24      | 30.27     | Gly345  | 10.20 | 124.11 | 172.47 | 45.48      | -         |
| Met295  | 8.51  | 128.27 | 170.48 | 52.83      | 34.47     | Asn346  | 8.09  | 123.46 | 172.75 | 49.86      | 35.31     |
| Phe296  | 8.97  | 125.31 | 173.61 | 54.20      | 39.66     | Lys347  | 7.83  | 120.97 | 172.07 | 52.83      | 35.97     |
| Phe297  | 8.80  | 119.94 | 174.28 | 56.50      | 39.41     | Tyr348  | 8.51  | 118.02 | 170.56 | 53.41      | 40.42     |
| Lys298  | 9.17  | 125.91 | 172.48 | 54.33      | 33.94     | Trp349  | 9.13  | 122.67 | 171.63 | 56.79      | 33.77     |
| Asp299  | 10.17 | 130.93 | 174.61 | 55.68      | 38.31     | Ala350  | n.d.  | n.d.   | 173.55 | 48.13      | 19.73     |
| Arg300  | 7.42  | 123.49 | 174.22 | 54.80      | 29.67     | Val351  | 9.08  | 120.12 | 173.03 | 57.55      | 33.84     |
| Phe301  | 9.07  | 123.97 | 172.66 | 56.67      | 41.30     | Gln352  | 8.44  | 125.64 | 175.15 | 53.63      | 30.84     |
| Tyr302  | 9.00  | 118.19 | 171.87 | 53.73      | 41.25     | Gly353  | 9.50  | 120.53 | 173.21 | 45.49      | -         |
| Met303  | 9.06  | 120.35 | 173.08 | 52.45      | 35.58     | Gln354  | 9.00  | 126.96 | 173.34 | 55.11      | 28.47     |
| Arg304  | 9.06  | 125.11 | 173.31 | 53.24      | 32.97     | Asn355  | 8.03  | 119.50 | 172.75 | 51.50      | 38.96     |
| Thr305  | 9.03  | 120.21 | 170.89 | 59.12      | 68.89     | Val356  | 8.68  | 127.20 | 175.05 | 61.30      | 30.08     |
| Asn306  | 8.94  | 125.39 | 172.57 | 49.34      | 39.78     | Leu357  | 8.31  | 132.13 | 175.67 | 54.29      | 40.35     |
| Pro307  | -     | n.d.   | 175.32 | 62.68      | 30.48     | His358  | 8.71  | 121.26 | 174.57 | 55.78      | 27.39     |
| Phe308  | 8.44  | 118.62 | 173.71 | 56.74      | 37.79     | Gly359  | 8.62  | 113.57 | 171.01 | 43.31      | -         |
| Tyr309  | 7.93  | 121.48 | 173.10 | 53.47      | 37.97     | Tyr360  | 7.30  | 118.93 | 171.81 | 55.45      | 36.49     |
| Pro310  | -     | n.d.   | 175.27 | 62.49      | 30.14     | Pro361  | -     | n.d.   | 173.85 | 59.98      | n.d.      |
| Glu311  | 7.85  | 121.33 | 174.38 | 54.88      | 29.38     | Lys362  | 7.86  | 120.86 | 172.99 | 52.92      | 35.64     |
| Val312  | 8.42  | 125.82 | 173.30 | 60.42      | 31.43     | Asp363  | 8.20  | 119.75 | 176.53 | 51.68      | 42.31     |
| Glu313  | 8.33  | 130.87 | 172.15 | 53.78      | 30.03     | Ile364  | 7.98  | 114.71 | 174.86 | 63.12      | -         |
| Leu314  | 8.25  | 131.05 | 173.91 | 52.31      | 43.07     | Tyr365  | 7.61  | 127.10 | 177.64 | 59.10      | 34.91     |
| Asn315  | 7.93  | 124.99 | 171.60 | 49.46      | 40.57     | Ser366  | 9.55  | 118.77 | 175.48 | 59.23      | 60.63     |
| Phe316  | 8.95  | 120.95 | 176.17 | 56.09      | 37.99     | Ser367  | 6.96  | 116.53 | 172.40 | 59.48      | 62.13     |
| Ile317  | 8.94  | 127.76 | 175.75 | 65.63      | n.d.      | Phe368  | 7.03  | 116.41 | 173.44 | 56.56      | 39.51     |
| Ser318  | 8.64  | 113.04 | 173.76 | 58.67      | 61.51     | Gly369  | 7.51  | 105.19 | 174.34 | 44.21      | -         |
| Val319  | 7.38  | 121.84 | 174.73 | 63.13      | 30.27     | Phe370  | 6.36  | 117.55 | 171.48 | 56.36      | 37.35     |
| Phe320  | 7.14  | 123.28 | 173.91 | 57.93      | 38.85     | Pro371  | -     | n.d.   | 176.06 | 60.66      | 30.89     |
| Trp321  | 8.27  | 116.35 | 171.77 | 53.57      | 28.05     | Arg372  | 8.58  | 119.90 | 174.13 | 56.19      | 27.25     |
| Pro322  | -     | n.d.   | 176.35 | 63.18      | 30.55     | Thr373  | 6.98  | 107.22 | 174.25 | 60.65      | 67.08     |

**Suppl. Table S2. Chemical Shift Assignments for HPX-1 at pH 4.8 and 25°C (continued).**

| Residue | H     | N      | C      | C $\alpha$ | C $\beta$ | Residue | H    | N      | C      | C $\alpha$ | C $\beta$ |
|---------|-------|--------|--------|------------|-----------|---------|------|--------|--------|------------|-----------|
| Val374  | 7.76  | 126.03 | 173.49 | 62.18      | 30.00     | Ile422  | 7.46 | 110.33 | 171.60 | 42.70      | n.d.      |
| Lys375  | 8.88  | 129.27 | 173.46 | 54.23      | 32.31     | Gly423  | 7.98 | 116.66 | 171.52 | 53.69      | 29.69     |
| His376  | 7.22  | 114.07 | 170.14 | 52.77      | 29.86     | His424  | 7.28 | 120.19 | 172.14 | 53.64      | 33.79     |
| Ile377  | 10.10 | 125.53 | 173.19 | 57.45      | n.d.      | Lys425  | 9.97 | 128.78 | 173.73 | 60.16      | 32.91     |
| Asp378  | 8.52  | 124.99 | 173.99 | 55.04      | n.d.      | Val426  | 9.14 | 127.14 | 174.77 | 54.06      | 39.86     |
| Ala379  | 7.93  | 120.33 | 173.42 | 50.58      | 21.17     | Asp427  | 7.94 | 121.84 | 172.72 | 49.89      | 20.68     |
| Ala380  | 8.91  | 126.33 | 172.15 | 50.14      | 22.56     | Ala428  | 8.45 | 121.21 | 169.21 | 57.77      | 32.20     |
| Leu381  | 8.08  | 117.99 | 171.24 | 53.51      | 43.80     | Val429  | 7.81 | 120.48 | 169.35 | 55.02      | 39.34     |
| Ser382  | 8.69  | 120.32 | 172.65 | 55.37      | 63.71     | Phe430  | 8.83 | 122.86 | 173.10 | 52.36      | 34.09     |
| Glu383  | 9.17  | 132.87 | 175.14 | 54.54      | 29.82     | Met431  | 8.85 | 126.97 | 174.11 | 55.69      | 35.37     |
| Glu384  | 8.23  | 131.5  | 175.72 | 57.2       | 28.45     | Lys432  | 9.94 | 130.05 | 173.35 | 54.27      | 38.61     |
| Asn385  | 9.15  | 117.66 | 174.63 | 54.39      | 36.68     | Asp433  | 8.65 | 104.21 | 171.81 | 43.57      | n.d.      |
| Thr386  | 7.79  | 109.77 | 174.78 | 60.47      | 69.79     | Gly434  | 7.81 | 119.29 | 173.13 | 55.59      | 39.97     |
| Gly387  | 8.52  | 112.88 | 170.17 | 44.82      | -         | Phe435  | 8.82 | 121.14 | 172.37 | 52.12      | 38.12     |
| Lys388  | 7.73  | 117.59 | 173.49 | 51.30      | 32.04     | Phe436  | 8.71 | 124.56 | 172.68 | 56.02      | 36.88     |
| Thr389  | 9.31  | 124.54 | 170.84 | 58.66      | 68.85     | Tyr437  | 8.73 | 122.34 | 174.30 | 56.20      | 41.89     |
| Tyr390  | 8.93  | 127.90 | 172.02 | 54.61      | 39.31     | Phe438  | 8.95 | 121.01 | 174.44 | 55.33      | 39.30     |
| Phe391  | 8.67  | 121.11 | 173.05 | 54.54      | n.d.      | Phe439  | 9.19 | 124.05 | 173.30 | 54.06      | 29.40     |
| Phe392  | 8.99  | 125.00 | 173.31 | 57.01      | n.d.      | His440  | 9.93 | 123.62 | 173.22 | 45.51      | n.d.      |
| Val393  | 9.52  | 127.54 | 172.94 | 60.83      | 33.73     | Gly441  | 8.52 | 118.00 | 173.01 | 60.55      | 67.19     |
| Ala394  | 9.53  | 134.36 | 172.96 | 52.78      | 15.28     | Thr442  | 8.12 | 125.00 | 171.55 | 54.50      | 30.98     |
| Asn395  | 8.37  | 118.24 | 173.90 | 52.08      | 36.35     | Arg443  | 8.01 | 123.40 | 172.07 | 50.91      | n.d.      |
| Lys396  | 8.56  | 124.01 | 172.00 | 54.12      | n.d.      | Gln444  | 9.64 | 128.68 | 173.05 | 54.40      | 31.57     |
| Tyr397  | 9.10  | 116.62 | 170.54 | 55.01      | 41.23     | Tyr445  | 8.29 | 127.37 | 172.09 | 54.07      | 32.80     |
| Trp398  | 9.41  | 124.29 | 172.91 | 56.87      | n.d.      | Lys446  | 9.83 | 133.75 | 171.76 | 55.32      | 42.21     |
| Arg399  | 7.61  | 116.59 | 169.70 | 52.56      | n.d.      | Phe447  | 8.40 | 130.05 | 172.97 | 48.60      | 41.50     |
| Tyr400  | 9.56  | 132.31 | 170.97 | 55.48      | 41.91     | Asp448  | 7.46 | 110.33 | 171.60 | 42.70      | n.d.      |
| Asp401  | 7.71  | 129.13 | 174.28 | 51.29      | 42.00     | Pro449  | -    | n.d.   | 176.01 | 62.09      | 30.83     |
| Glu402  | 8.92  | 125.41 | 176.84 | 55.99      | n.d.      | Lys450  | 8.02 | 119.82 | 176.59 | 57.45      | 30.43     |
| Tyr403  | 8.06  | 119.34 | 177.06 | 57.95      | 35.79     | Thr451  | 6.82 | 107.76 | 172.92 | 59.72      | 68.54     |
| Lys404  | 8.81  | 122.53 | 175.00 | 55.44      | 31.29     | Lys452  | 7.94 | 120.25 | 172.41 | 55.68      | 27.55     |
| Arg405  | 7.91  | 118.16 | 173.67 | 55.14      | 24.70     | Arg453  | 6.53 | 116.55 | 173.58 | 52.66      | 32.30     |
| Ser406  | 6.96  | 112.04 | 172.39 | 55.26      | 64.13     | Ile454  | 8.47 | 123.26 | 174.85 | 59.64      | 37.08     |
| Met407  | 9.04  | 127.42 | 175.46 | 54.04      | n.d.      | Leu455  | 9.23 | 130.72 | 175.92 | 54.49      | 41.83     |
| Asp408  | 8.68  | 129.52 | n.d.   | 52.05      | 38.37     | Thr456  | 7.14 | 111.20 | 169.43 | 59.20      | 70.23     |
| Pro409  | -     | n.d.   | 176.30 | 61.47      | 30.60     | Leu457  | 8.22 | 128.32 | 174.29 | 52.74      | 41.97     |
| Gly410  | 8.64  | 110.15 | 171.52 | 43.89      | -         | Gln458  | 9.06 | 125.91 | 174.03 | 52.06      | 31.79     |
| Tyr411  | 7.60  | 119.94 | 175.28 | 55.73      | 37.06     | Lys459  | 8.63 | 122.62 | 177.79 | 54.62      | 31.73     |
| Pro412  | -     | n.d.   | n.d.   | 59.67      | n.d.      | Ala460  | 8.32 | 126.88 | 175.27 | 53.56      | 16.35     |
| Lys413  | 7.96  | 120.99 | 173.40 | 53.10      | 35.44     | Asn461  | 7.63 | 114.00 | 177.04 | 50.80      | 36.45     |
| Met414  | 8.73  | 119.34 | 176.85 | 53.35      | 29.56     | Ser462  | 7.35 | 117.19 | 173.93 | 61.02      | n.d.      |
| Ile415  | 8.57  | 128.09 | 175.92 | 65.26      | 37.82     | Trp463  | 7.99 | 123.87 | 174.39 | 57.00      | 25.93     |
| Ala416  | 9.19  | 119.61 | 177.08 | 52.45      | 16.85     | Phe464  | 7.24 | 118.45 | 173.36 | 52.43      | 36.72     |
| His417  | 6.96  | 113.50 | 174.14 | 56.15      | 28.53     | Asn465  | 8.11 | 118.94 | 173.18 | 52.33      | 35.71     |
| Asp418  | 6.85  | 117.70 | 172.51 | 53.37      | 40.36     | Cys466  | 8.48 | 121.25 | 173.92 | 54.44      | 39.68     |
| Phe419  | 8.42  | 120.81 | 169.66 | 52.77      | 36.15     | Arg467  | 8.57 | 125.46 | 174.59 | 54.79      | 29.32     |
| Pro420  | -     | n.d.   | 176.06 | 62.33      | 30.14     | Lys468  | 8.40 | 125.25 | 173.80 | 54.80      | 31.55     |
| Gly421  | 8.17  | 111.18 | 173.54 | 43.89      | -         | Asn469  | 8.00 | 127.70 | 177.86 | 53.13      | 38.83     |

n.d. : not determined

**Suppl. Figure S1: SE AUC analysis of MMP-1 HPX domain.** Data recorded at (A–C) 15000rpm and (D–F) 18000rpm are shown for HPX concentrations of (A, D) 0.5mg/ml, (B, E) 1.0mg/ml and (C, F) 5.0mg/ml. For each, the calculated MW are shown and the residuals are displayed below. (G) Plot of apparent MW *versus* protein concentration for rotor speeds of 15000 and 18000 rpm. The horizontal dashed line indicates the theoretical MW of HPX-1 (23.6 kDa).

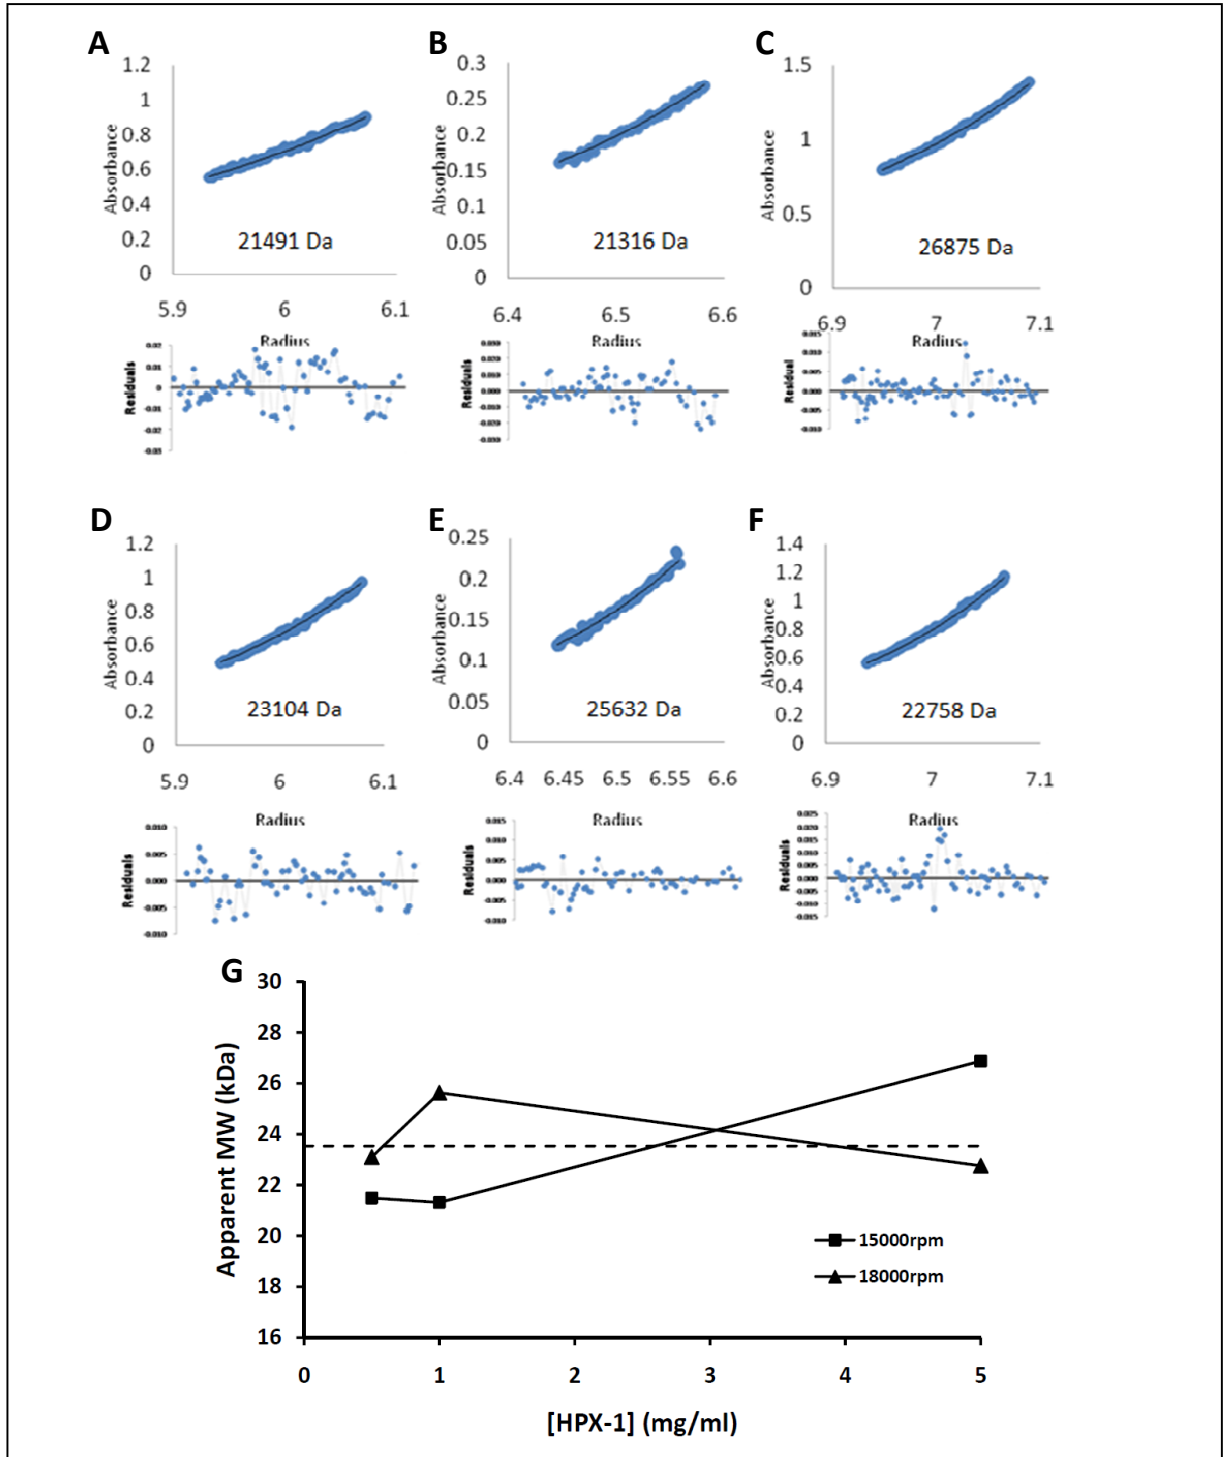

**Suppl. Figure S2: SE AUC analysis of HPX:THP complex.** Data recorded at 15000 rpm are shown for  $\alpha 1(I)772-787$  THP:HPX molar ratios of (A) 0:1 (i.e. free HPX), (B) 1:1, (C) 2:1, (D) 5:1, (E) 10:1 and (F) 20:1. The apparent MW is displayed for each molar ratio. The residuals displayed beneath each plot are randomly dispersed showing a good fit of the model to the data.

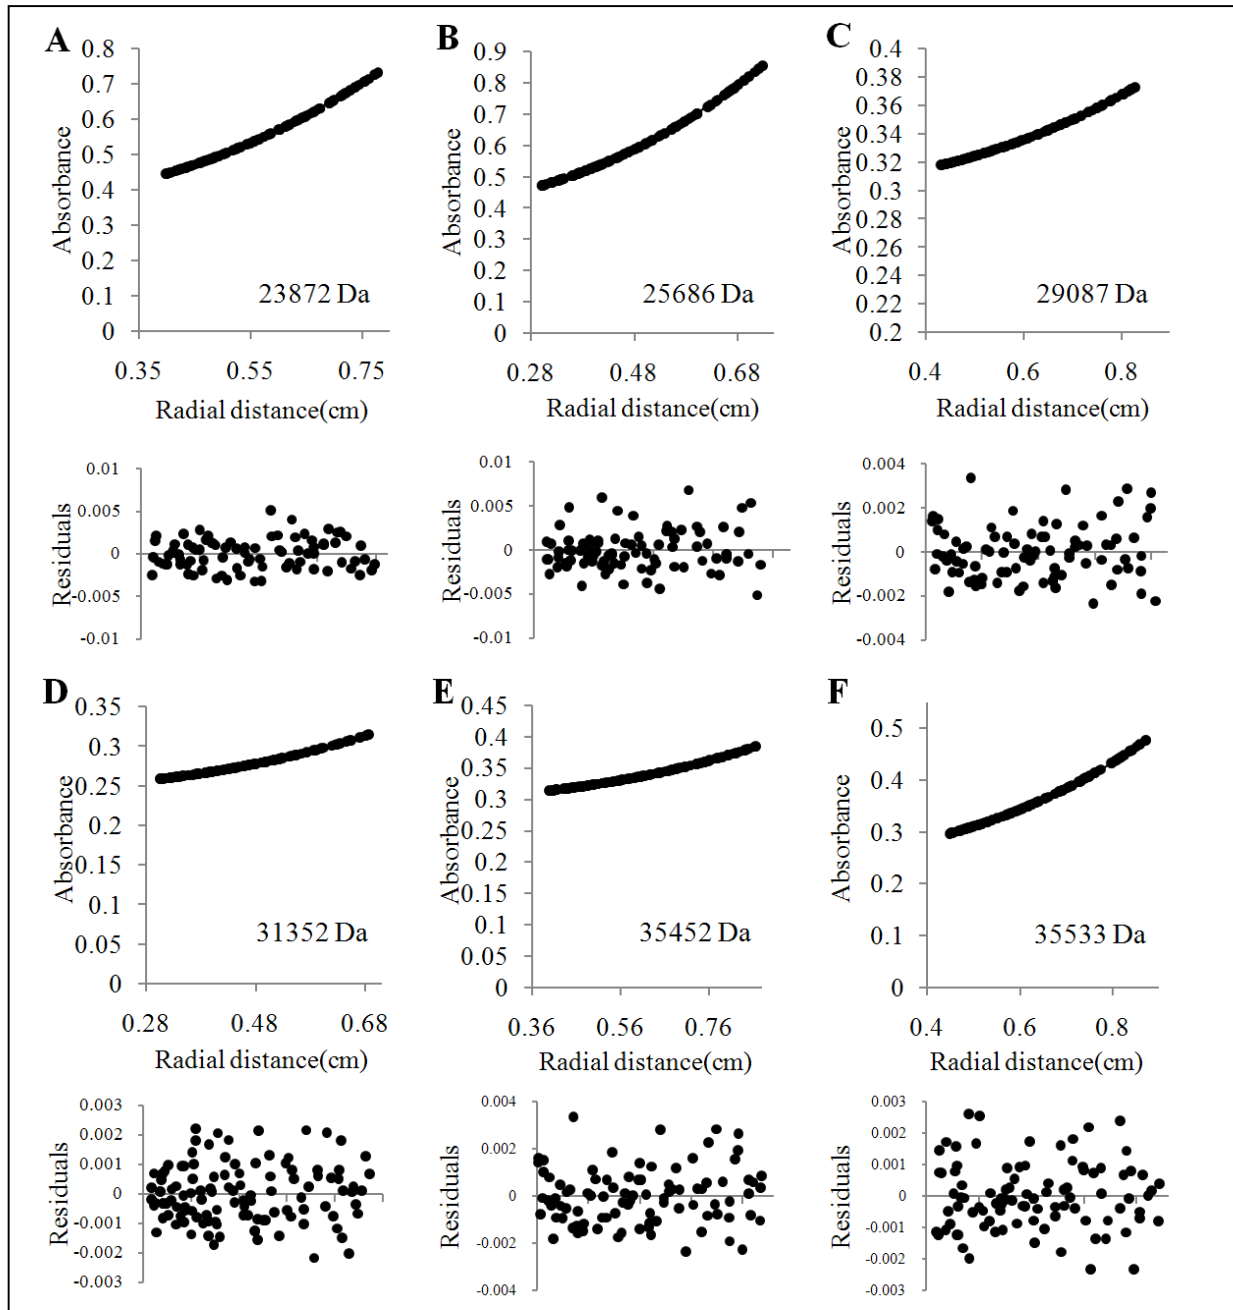

**Suppl. Figure S3. NMR-Monitored Titration of  $^{15}\text{N}$ -labelled HPX-1 with  $\alpha 1(\text{I})772\text{--}787$  THP.** Overlay of the  $^1\text{H}$ ,  $^{15}\text{N}$ -HSQC spectra of free HPX-1 (in black) with the first six points from the  $\alpha 1(\text{I})772\text{--}787$  THP titration (i.e. HPX-1:THP molar ratios of 1:0 to 1:1.2). Each spectrum has only one contour to highlight the loss of intensity upon addition of the THP. The inset portions show example losses of spectral intensity due to line broadening of the backbone  $^1\text{H}_{\text{N}}\text{--}^{15}\text{N}_{\text{H}}$  cross-peaks for (A) D299, (B) N326 and (C) G353.

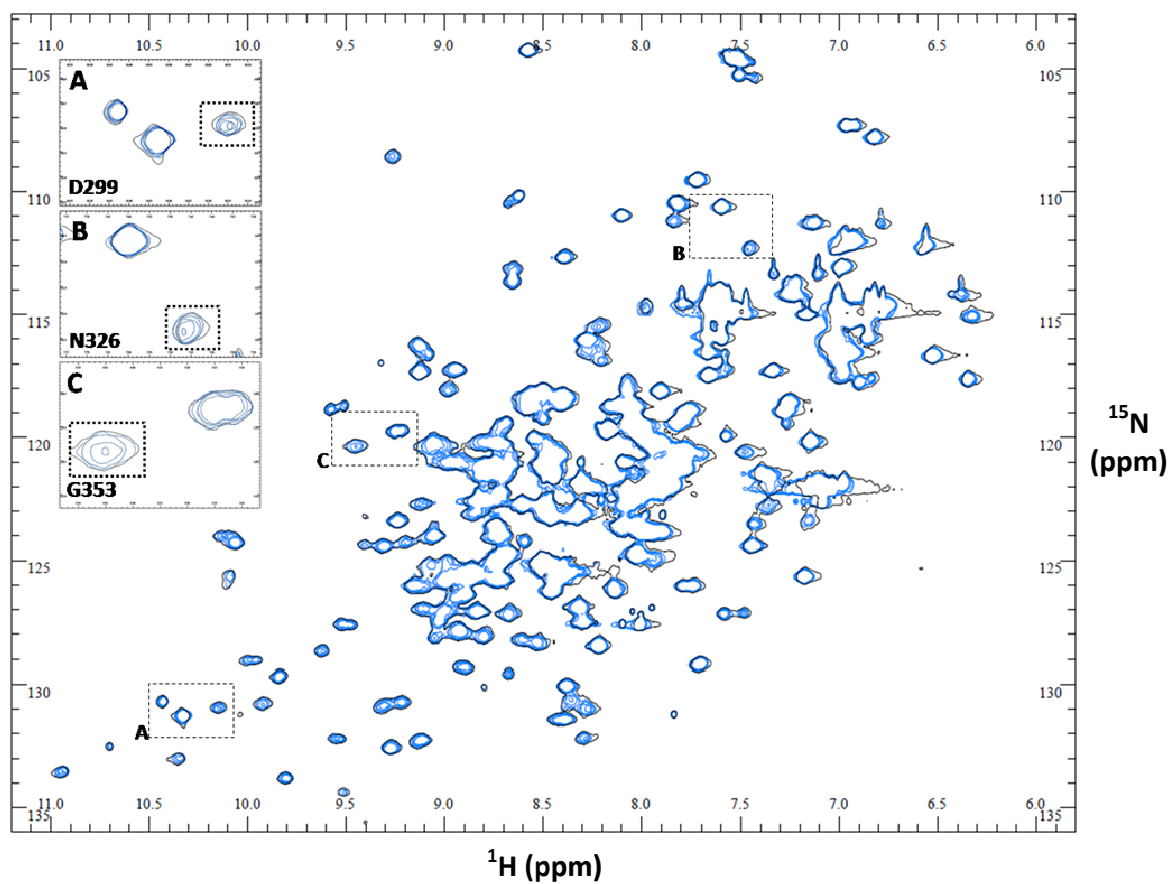

**Suppl. Figure S4: NMR analysis of WT and mutant HPX-1 proteins.** Extracts of the  $^1\text{H}^{15}\text{N}$ -HSQC spectra of (A) WT HPX-1 (B) mutant HPX-1(F301A), and (C) HPX-1(V319A) are shown. Each spectrum was recorded at pH 4.8 and 25°C.

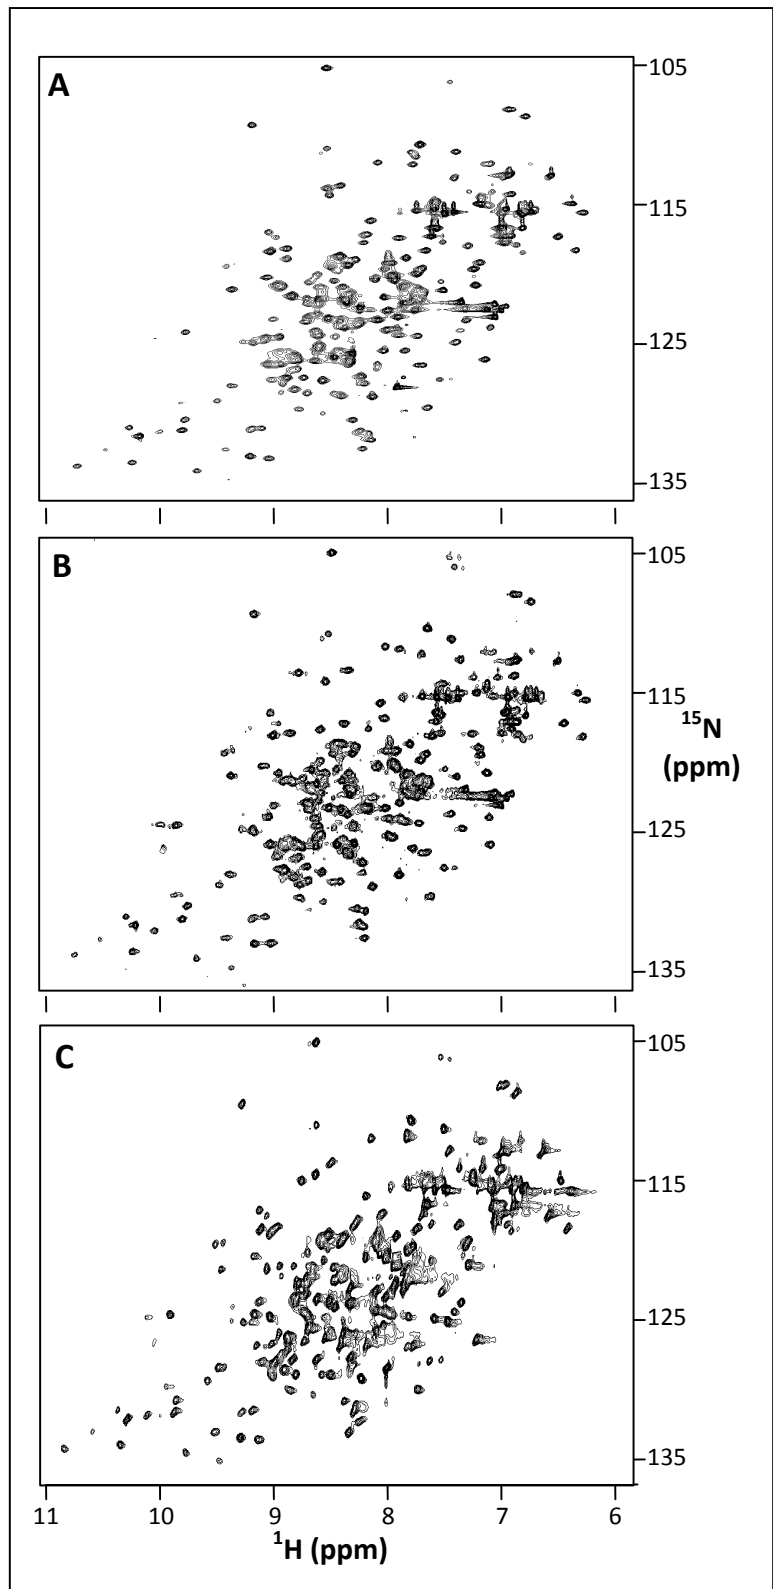

**Suppl. Figure S5: SAXS analysis of proMMP-1\*, MMP-1\* and MMP-1\*(F301A).** (A-C) Experimental scattering data for (A) proMMP-1\*, (B) MMP-1\* and (C) MMP-1\*(F301A). The logarithm of the scattering intensity is plotted against the momentum transfer. The overlaid red lines in (A) and (B) are scattering patterns simulated from the crystal structure coordinates of proMMP-1\* and MMP-1\*, respectively, using the program *CRY SOL*. (D, E) Orthogonal views of the average low resolution solution state models of (D) proMMP-1\*, and (E) MMP-1\* generated by *ab initio* modeling from the simulated scattering data (the red lines in parts (A) and (B), respectively). Each has been automatically overlaid over their crystal structures using the program *SUPCOMB*. In the crystal structures, the PRO domain is coloured red, the CAT domain green and the HPX domain blue. The good agreement between the crystal and simulated solution models validates the *ab initio* modeling technique.

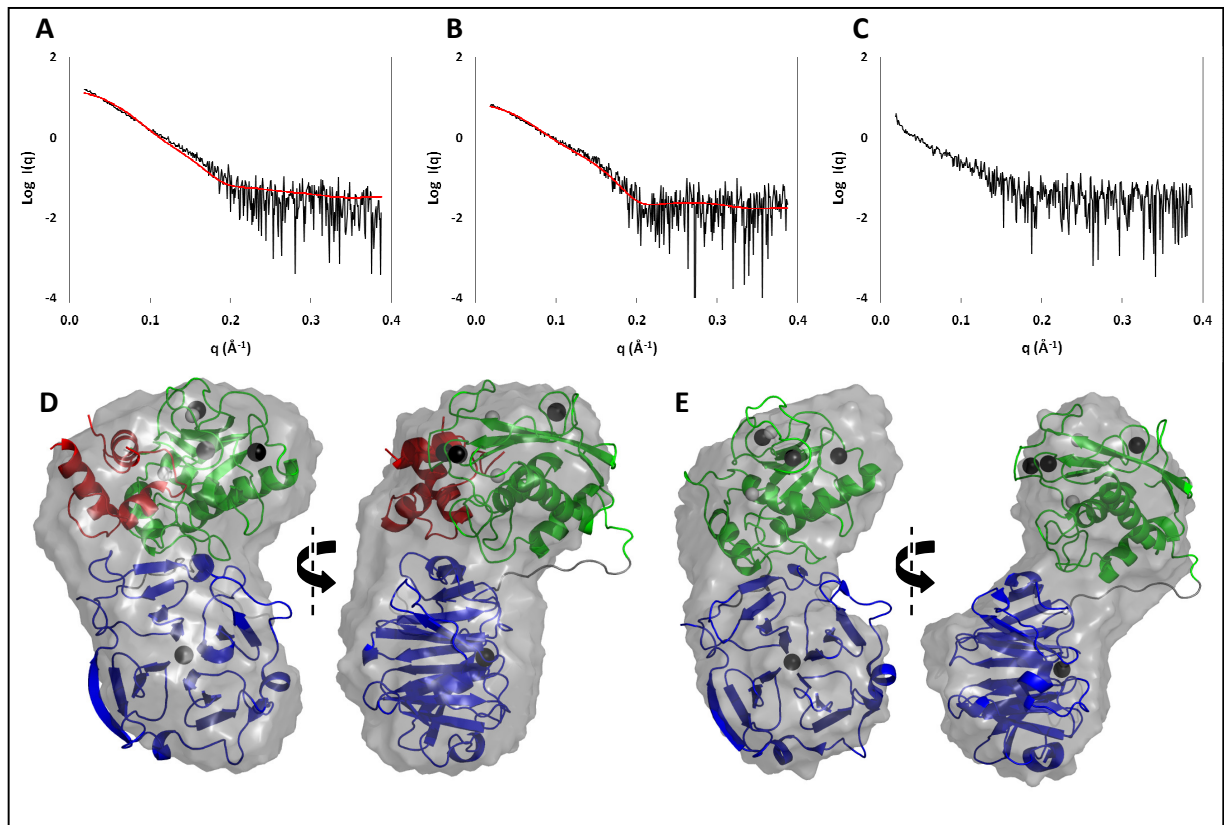

Supplement: supp_M111.285213_jbc.M111.285213-1.pdf [file supp_M111.285213_jbc.M111.285213-1.pdf]
